# Supplementary material for: Statistical Methods for Adjusting Estimates of Treatment Effectiveness for Patient Nonadherence in the Context of Time-to-Event Outcomes and Health Technology Assessment: A Systematic Review of Methodological Papers
Source: PubMed Central journal article supplement (PMC6900590; doi:10.1177/0272989x19881654), 2019-10-24
Supplement: Appendix_A_online_supp.pdf [file Appendix_A_online_supp.pdf]

## Appendix A: Search terms, strategies and results

### A1: Search terms

Patient adherence terms include compliance, adherence, pharmacoadherence, persistence, persistency, concordance, initiation, implementation, noncompliance, nonadherence, nonpersistence, discontinuation, pharmionics, therapeutic alliance, patient irregularity or treatment refusal. MeSH headings for methods include “models, statistical” or “models, structural” or “models, economic” or “models, econometric” or “models, biological” or “survival analysis” or “logistic models” or “proportional hazards models”.

### A2: First iteration searches and results

**MEDLINE(R) Epub Ahead of Print, In-Process & Other Non-Indexed Citations, MEDLINE(R) Daily, MEDLINE and Versions(R): Ovid 1946 to February 9 2018**

| # | Terms                                                                                                                                                                                                                                                                                     | Results |
|---|-------------------------------------------------------------------------------------------------------------------------------------------------------------------------------------------------------------------------------------------------------------------------------------------|---------|
| 1 | (compliance or adherence or pharmacoadherence or persistence or persistency or concordance or initiation or implementation or noncompliance or nonadherence or nonpersistence or discontinuation or pharmionics or therapeutic alliance or patient irregularity or treatment refusal).ti. | 120596  |
| 2 | *Models, Structural/                                                                                                                                                                                                                                                                      | 2122    |
| 3 | *models, statistical/                                                                                                                                                                                                                                                                     | 28208   |
| 4 | *models, economic/ or *models, econometric/                                                                                                                                                                                                                                               | 4387    |
| 5 | 1 and (2 or 3 or 4)                                                                                                                                                                                                                                                                       | 245     |

**MEDLINE(R) Epub Ahead of Print, In-Process & Other Non-Indexed Citations, MEDLINE(R) Daily, MEDLINE and Versions(R): Ovid 1946 to March 28 2018 - Adding “Models, Biological” MeSH heading.**

**3<sup>rd</sup> April 2018**

|   |                                                                                                                                                                                                                                                                                           |        |
|---|-------------------------------------------------------------------------------------------------------------------------------------------------------------------------------------------------------------------------------------------------------------------------------------------|--------|
| 1 | (compliance or adherence or pharmacoadherence or persistence or persistency or concordance or initiation or implementation or noncompliance or nonadherence or nonpersistence or discontinuation or pharmionics or therapeutic alliance or patient irregularity or treatment refusal).ti. | 121991 |
| 2 | *Models, Structural/                                                                                                                                                                                                                                                                      | 2128   |
| 3 | *Models, Statistical/                                                                                                                                                                                                                                                                     | 28482  |
| 4 | *models, economic/ or *models, econometric/                                                                                                                                                                                                                                               | 4416   |
| 5 | *Models, Biological/                                                                                                                                                                                                                                                                      | 97476  |
| 6 | 1 and (2 or 3 or 4)                                                                                                                                                                                                                                                                       | 249    |
| 7 | 1 and 5                                                                                                                                                                                                                                                                                   | 625    |
| 8 | limit 7 to humans                                                                                                                                                                                                                                                                         | 324    |
| 9 | 8 not 6                                                                                                                                                                                                                                                                                   | 316    |

**Embase: Ovid 1974 to 2018 March 30**

**3<sup>rd</sup> April 2018**

|   |                                                                                                                                                                                                                                                                                           |        |
|---|-------------------------------------------------------------------------------------------------------------------------------------------------------------------------------------------------------------------------------------------------------------------------------------------|--------|
| 1 | (compliance or adherence or pharmacoadherence or persistence or persistency or concordance or initiation or implementation or noncompliance or nonadherence or nonpersistence or discontinuation or pharmionics or therapeutic alliance or patient irregularity or treatment refusal).ti. | 159985 |
|---|-------------------------------------------------------------------------------------------------------------------------------------------------------------------------------------------------------------------------------------------------------------------------------------------|--------|

|   |                     |       |
|---|---------------------|-------|
| 2 | *structural model/  | 153   |
| 3 | *statistical model/ | 21073 |
| 4 | *economic model/    | 491   |
| 5 | *biological model/  | 56706 |
| 6 | 1 and (2 or 3 or 4) | 143   |
| 7 | 1 and 5             | 381   |
| 8 | limit 7 to human    | 156   |
| 9 | 6 or 8              | 298   |

**Cochrane Library: Wiley**  
**3<sup>rd</sup> April 2018**

|    |                                                                                                                                                                                                                                                                                                                               |       |
|----|-------------------------------------------------------------------------------------------------------------------------------------------------------------------------------------------------------------------------------------------------------------------------------------------------------------------------------|-------|
| #1 | (compliance or adherence or pharmacoadherence or persistence or persistency or concordance or initiation or implementation or noncompliance or nonadherence or nonpersistence or discontinuation or pharmionics or therapeutic alliance or patient irregularity or treatment refusal):ti (Word variations have been searched) | 12301 |
| #2 | MeSH descriptor: [Models, Structural] this term only                                                                                                                                                                                                                                                                          | 25    |
| #3 | MeSH descriptor: [Models, Statistical] this term only                                                                                                                                                                                                                                                                         | 1577  |
| #4 | MeSH descriptor: [Models, Economic] this term only                                                                                                                                                                                                                                                                            | 1578  |
| #5 | MeSH descriptor: [Models, Econometric] this term only                                                                                                                                                                                                                                                                         | 470   |
| #6 | MeSH descriptor: [Models, Biological] this term only                                                                                                                                                                                                                                                                          | 2370  |
| #7 | #1 and (#2 or #3 or #4 or #5)                                                                                                                                                                                                                                                                                                 | 52    |
| #8 | #1 and #6                                                                                                                                                                                                                                                                                                                     | 16    |
| #9 | #7 or #8                                                                                                                                                                                                                                                                                                                      | 67    |

**Econlit: Ovid 1886 to May 3, 2018**  
**8<sup>th</sup> May 2018**

|   |                                                                                                                                                                                                                                                                                           |        |
|---|-------------------------------------------------------------------------------------------------------------------------------------------------------------------------------------------------------------------------------------------------------------------------------------------|--------|
| 1 | (compliance or adherence or pharmacoadherence or persistence or persistency or concordance or initiation or implementation or noncompliance or nonadherence or nonpersistence or discontinuation or pharmionics or therapeutic alliance or patient irregularity or treatment refusal).ti. | 8632   |
| 2 | model*.ti.                                                                                                                                                                                                                                                                                | 90932  |
| 3 | (structural or statistical or economic or econometric or biological).ti.                                                                                                                                                                                                                  | 114247 |
| 4 | 1 and 2 and 3                                                                                                                                                                                                                                                                             | 31     |

**Web of Science: Clarivate Analytics**  
**8<sup>th</sup> May 2018**

|     |                                                                                                                                                                                                                                                                                                |           |
|-----|------------------------------------------------------------------------------------------------------------------------------------------------------------------------------------------------------------------------------------------------------------------------------------------------|-----------|
| # 1 | TITLE: ((compliance or adherence or pharmacoadherence or persistence or persistency or concordance or initiation or implementation or noncompliance or nonadherence or nonpersistence or discontinuation or pharmionics or therapeutic alliance or patient irregularity or treatment refusal)) | 256,870   |
| # 2 | TITLE: (model*)                                                                                                                                                                                                                                                                                | 1,892,481 |
| # 3 | TITLE: ((structural or statistical or economic or econometric or biological))                                                                                                                                                                                                                  | 706,793   |
| # 4 | #3 AND #2 AND #1                                                                                                                                                                                                                                                                               | 240       |

**Scopus: Elsevier**  
**8<sup>th</sup> May 2018**

|    |                                                                                                                                                                                         |         |
|----|-----------------------------------------------------------------------------------------------------------------------------------------------------------------------------------------|---------|
| #1 | ( TITLE ( ( compliance OR adherence OR pharmacoadherence OR persistence OR persistency OR concordance OR initiation OR implementation OR noncompliance ) ) OR TITLE ( ( nonadherence OR | 321,353 |
|----|-----------------------------------------------------------------------------------------------------------------------------------------------------------------------------------------|---------|

|    |                                                                                                                                                                                                                                                                                                                                                                                                                                                        |           |
|----|--------------------------------------------------------------------------------------------------------------------------------------------------------------------------------------------------------------------------------------------------------------------------------------------------------------------------------------------------------------------------------------------------------------------------------------------------------|-----------|
|    | nonpersistence OR discontinuation OR pharmionics OR therapeutic AND alliance OR patient AND irregularity OR treatment AND refusal )))                                                                                                                                                                                                                                                                                                                  |           |
| #2 | TITLE ( model* )                                                                                                                                                                                                                                                                                                                                                                                                                                       | 2,338,498 |
| #3 | TITLE ( ( structural OR statistical OR economic OR econometric OR biological ) )                                                                                                                                                                                                                                                                                                                                                                       | 905,167   |
| #4 | (( TITLE ( ( compliance OR adherence OR pharmacoadherence OR persistence OR persistency OR concordance OR initiation OR implementation OR noncompliance ) ) OR TITLE ( ( nonadherence OR nonpersistence OR discontinuation OR pharmionics OR therapeutic AND alliance OR patient AND irregularity OR treatment AND refusal ) ) ) ) AND ( TITLE ( model* ) ) AND ( TITLE ( ( structural OR statistical OR economic OR econometric OR biological ) ) ) ) | 323       |

### A3: Second iteration searches and results

**MEDLINE(R) Epub Ahead of Print, In-Process & Other Non-Indexed Citations, MEDLINE(R) Daily, MEDLINE and Versions(R): Ovid 1946 to May 16, 2018**

**22<sup>nd</sup> May 2018**

| #  | Terms                                                                                                                                                                                                                                                                                     | Results |
|----|-------------------------------------------------------------------------------------------------------------------------------------------------------------------------------------------------------------------------------------------------------------------------------------------|---------|
| 1  | (compliance or adherence or pharmacoadherence or persistence or persistency or concordance or initiation or implementation or noncompliance or nonadherence or nonpersistence or discontinuation or pharmionics or therapeutic alliance or patient irregularity or treatment refusal).ti. | 123742  |
| 2  | *Models, Structural/                                                                                                                                                                                                                                                                      | 2129    |
| 3  | *Models, Statistical/                                                                                                                                                                                                                                                                     | 28851   |
| 4  | *models, economic/ or *models, econometric/                                                                                                                                                                                                                                               | 4476    |
| 5  | *Models, Biological/                                                                                                                                                                                                                                                                      | 98419   |
| 6  | 1 and (2 or 3 or 4)                                                                                                                                                                                                                                                                       | 250     |
| 7  | 1 and 5                                                                                                                                                                                                                                                                                   | 634     |
| 8  | limit 7 to humans                                                                                                                                                                                                                                                                         | 329     |
| 9  | 8 not 6                                                                                                                                                                                                                                                                                   | 321     |
| 10 | *Survival Analysis/                                                                                                                                                                                                                                                                       | 2666    |
| 11 | *Proportional Hazards Models/                                                                                                                                                                                                                                                             | 1811    |
| 12 | *Linear Models/                                                                                                                                                                                                                                                                           | 2498    |
| 13 | *Logistic Models/                                                                                                                                                                                                                                                                         | 1675    |
| 14 | Biometry/mt [Methods]                                                                                                                                                                                                                                                                     | 4244    |
| 15 | Randomized Controlled Trials as Topic/sn [Statistics & Numerical Data]                                                                                                                                                                                                                    | 4789    |
| 16 | Cost-Benefit Analysis/sn [Statistics & Numerical Data]                                                                                                                                                                                                                                    | 981     |
| 17 | Economics, Pharmaceutical/sn [Statistics & Numerical Data]                                                                                                                                                                                                                                | 144     |
| 18 | or/10-17                                                                                                                                                                                                                                                                                  | 17625   |
| 19 | pharmacometric*.tw.                                                                                                                                                                                                                                                                       | 388     |
| 20 | causal inference.tw.                                                                                                                                                                                                                                                                      | 1455    |
| 21 | proportional hazards.ti.                                                                                                                                                                                                                                                                  | 411     |
| 22 | structural model*.ti.                                                                                                                                                                                                                                                                     | 1624    |
| 23 | proportional hazards model*.ab.                                                                                                                                                                                                                                                           | 20752   |
| 24 | structural nested model*.ab.                                                                                                                                                                                                                                                              | 27      |
| 25 | marginal structural model*.ab.                                                                                                                                                                                                                                                            | 518     |
| 26 | structural proportional hazards.ab.                                                                                                                                                                                                                                                       | 3       |
| 27 | structural accelerated failure.ab.                                                                                                                                                                                                                                                        | 7       |
| 28 | compliance class model*.ab.                                                                                                                                                                                                                                                               | 2       |
| 29 | preserving structural failure.ab.                                                                                                                                                                                                                                                         | 31      |
| 30 | rank preserving structural.ab.                                                                                                                                                                                                                                                            | 31      |
| 31 | accelerated failure time.ab.                                                                                                                                                                                                                                                              | 479     |
| 32 | or/19-31                                                                                                                                                                                                                                                                                  | 25187   |

|    |                    |       |
|----|--------------------|-------|
| 33 | 18 or 32           | 41976 |
| 34 | 1 and 33           | 616   |
| 35 | limit 34 to humans | 523   |
| 36 | 35 not 9           | 520   |

**Embase: Ovid 1974 to 2018 May 21**

**22<sup>nd</sup> May 2018**

|    |                                                                                                                                                                                                                                                                                           |        |
|----|-------------------------------------------------------------------------------------------------------------------------------------------------------------------------------------------------------------------------------------------------------------------------------------------|--------|
| 1  | (compliance or adherence or pharmacoadherence or persistence or persistency or concordance or initiation or implementation or noncompliance or nonadherence or nonpersistence or discontinuation or pharmionics or therapeutic alliance or patient irregularity or treatment refusal).ti. | 162336 |
| 2  | *structural model/                                                                                                                                                                                                                                                                        | 160    |
| 3  | *statistical model/                                                                                                                                                                                                                                                                       | 21307  |
| 4  | *economic model/                                                                                                                                                                                                                                                                          | 506    |
| 5  | *biological model/                                                                                                                                                                                                                                                                        | 57036  |
| 6  | 1 and (2 or 3 or 4)                                                                                                                                                                                                                                                                       | 146    |
| 7  | 1 and 5                                                                                                                                                                                                                                                                                   | 385    |
| 8  | limit 7 to human                                                                                                                                                                                                                                                                          | 157    |
| 9  | 6 or 8                                                                                                                                                                                                                                                                                    | 302    |
| 10 | *survival analysis/                                                                                                                                                                                                                                                                       | 645    |
| 11 | *proportional hazards model/                                                                                                                                                                                                                                                              | 1385   |
| 12 | 10 or 11                                                                                                                                                                                                                                                                                  | 2017   |
| 13 | pharmacometric*.tw.                                                                                                                                                                                                                                                                       | 568    |
| 14 | causal inference.tw.                                                                                                                                                                                                                                                                      | 1544   |
| 15 | proportional hazards.ti.                                                                                                                                                                                                                                                                  | 418    |
| 16 | structural model*.ti.                                                                                                                                                                                                                                                                     | 1691   |
| 17 | proportional hazards model*.ab.                                                                                                                                                                                                                                                           | 32565  |
| 18 | structural nested model*.ab.                                                                                                                                                                                                                                                              | 26     |
| 19 | marginal structural model*.ab.                                                                                                                                                                                                                                                            | 681    |
| 20 | structural proportional hazards.ab.                                                                                                                                                                                                                                                       | 3      |
| 21 | structural accelerated failure.ab.                                                                                                                                                                                                                                                        | 9      |
| 22 | compliance class model*.ab.                                                                                                                                                                                                                                                               | 2      |
| 23 | preserving structural failure.ab.                                                                                                                                                                                                                                                         | 98     |
| 24 | rank preserving structural.ab.                                                                                                                                                                                                                                                            | 98     |
| 25 | accelerated failure time.ab.                                                                                                                                                                                                                                                              | 552    |
| 26 | or/13-25                                                                                                                                                                                                                                                                                  | 37594  |
| 27 | 1 and (12 or 26)                                                                                                                                                                                                                                                                          | 702    |
| 28 | 27 not 9                                                                                                                                                                                                                                                                                  | 691    |

**Web of Science: Clarivate Analytics**

**22<sup>nd</sup> May 2018**

|     |                                                                                                                                                                                                                                                                                                |           |
|-----|------------------------------------------------------------------------------------------------------------------------------------------------------------------------------------------------------------------------------------------------------------------------------------------------|-----------|
| # 1 | TITLE: ((compliance or adherence or pharmacoadherence or persistence or persistency or concordance or initiation or implementation or noncompliance or nonadherence or nonpersistence or discontinuation or pharmionics or therapeutic alliance or patient irregularity or treatment refusal)) | 257,485   |
| # 2 | TITLE: (model*)                                                                                                                                                                                                                                                                                | 1,896,217 |
| # 3 | TITLE: ((structural or statistical or economic or econometric or biological))                                                                                                                                                                                                                  | 708,343   |
| # 4 | #3 AND #2 AND #1                                                                                                                                                                                                                                                                               | 240       |
| # 5 | TI=("survival analysis")                                                                                                                                                                                                                                                                       | 3,080     |
| # 6 | TI=("proportional hazards model*")                                                                                                                                                                                                                                                             | 513       |
| # 7 | TI=("linear model*")                                                                                                                                                                                                                                                                           | 6,683     |
| # 8 | TI=("logistic model*")                                                                                                                                                                                                                                                                         | 789       |
| # 9 | TOPIC: (pharmacometric*)                                                                                                                                                                                                                                                                       | 464       |

|      |                                                                                                                       |        |
|------|-----------------------------------------------------------------------------------------------------------------------|--------|
| # 10 | TS=("causal inference")                                                                                               | 3,246  |
| # 11 | TI=("proportional hazards")                                                                                           | 823    |
| # 12 | TI=("structural model*")                                                                                              | 4,117  |
| # 13 | TI=("proportional hazards model*")                                                                                    | 513    |
| # 14 | TOPIC: ("proportional hazards model*")                                                                                | 20,669 |
| # 15 | TOPIC: ("structural nested model*")                                                                                   | 43     |
| # 16 | TOPIC: ("marginal structural model*")                                                                                 | 1,192  |
| # 17 | TOPIC: ("structural proportional hazards")                                                                            | 3      |
| # 18 | TOPIC: ("structural accelerated failure")                                                                             | 9      |
| # 19 | TOPIC: ("compliance class model*")                                                                                    | 4      |
| # 20 | TOPIC: ("preserving structural failure")                                                                              | 37     |
| # 21 | TOPIC: ("rank preserving structural")                                                                                 | 38     |
| # 22 | TOPIC: ("accelerated failure time")                                                                                   | 849    |
| # 23 | #22 OR #21 OR #20 OR #19 OR #18 OR #17 OR #16 OR #15 OR #14 OR #13 OR #12 OR #11 OR #10 OR #9 OR #8 OR #7 OR #6 OR #5 | 40,195 |
| # 24 | #23 AND #1                                                                                                            | 575    |
| # 25 | #24 not #4                                                                                                            | 519    |

**MathSciNet: American Mathematical Society**

**23<sup>rd</sup> May 2018**

**27 records**

|     |                                                                                                                                                                                                                                             |       |                              |
|-----|---------------------------------------------------------------------------------------------------------------------------------------------------------------------------------------------------------------------------------------------|-------|------------------------------|
| 1.  | "Title=(compliance or adherence or pharmacoadherence or persistence or persistency or concordance or initiation or implementation)"                                                                                                         | 7806  | Compliance in title          |
| 2.  | "Title=(noncompliance or nonadherence or nonpersistence or discontinuation or pharmionics)"                                                                                                                                                 | 91    |                              |
| 3.  | 'Title=("therapeutic alliance" or "patient irregularity" or "treatment refusal")'                                                                                                                                                           | 0     |                              |
| 4.  | "Title=(model*)"                                                                                                                                                                                                                            | 21005 | Model in title               |
| 5.  | "Title=(structural or statistical or economic or econometric or biological)"                                                                                                                                                                | 36577 |                              |
| 6.  | "Review Text=(survival analysis or proportional hazards model* or linear model* or logistic model*)"                                                                                                                                        | 507   | Second iteration model terms |
| 7.  | "Review Text=(pharmacometric* or "causal inference")"                                                                                                                                                                                       | 439   |                              |
| 8.  | "Review Text=(proportional hazards or structural model* or proportional hazards model* or structural nested model*)"                                                                                                                        | 22    |                              |
| 9.  | 'Review Text=(marginal structural model* or structural proportional hazards or structural accelerated failure or compliance class model*)'                                                                                                  | 0     |                              |
| 10. | "Review Text=(preserving structural failure or rank preserving structural or accelerated failure time)"                                                                                                                                     | 5     | 1 <sup>st</sup> search       |
| 11. | "Title=(compliance or adherence or pharmacoadherence or persistence or persistency or concordance or initiation or implementation ) AND Title=(model*) AND Title=(structural or statistical or economic or econometric or biological)"      | 16    |                              |
| 12. | "Title=( noncompliance or nonadherence or nonpersistence or discontinuation or pharmionics) AND Title=(model*) AND Title=(structural or statistical or economic or econometric or biological)"                                              | 3     |                              |
| 13. | Title=(compliance or adherence or pharmacoadherence or persistence or persistency or concordance or initiation or implementation ) AND Review Text=(survival analysis or proportional hazards model* or linear model* or logistic model*)"' | 1     |                              |
| 14. | "Title=(noncompliance or nonadherence or nonpersistence or discontinuation or pharmionics) AND Review Text=(survival analysis or proportional hazards model* or linear model* or logistic model*)"'                                         | 0     |                              |

|     |                                                                                                                                                                                                                                                             |    |                               |
|-----|-------------------------------------------------------------------------------------------------------------------------------------------------------------------------------------------------------------------------------------------------------------|----|-------------------------------|
| 15. | "Title=(compliance or adherence or pharmacoadherence or persistence or persistency or concordance or initiation or implementation ) AND Review Text=(pharmacometric* or "causal inference")"                                                                | 3  | 2 <sup>nd</sup> search<br>(b) |
| 16. | "Title=(compliance or adherence or pharmacoadherence or persistence or persistency or concordance or initiation or implementation ) AND Review Text=(proportional hazards or structural model* or proportional hazards model* or structural nested model*)' | 0  |                               |
| 17. | "Title=(compliance or adherence or pharmacoadherence or persistence or persistency or concordance or initiation or implementation ) AND Review Text=(preserving structural failure or rank preserving structural or accelerated failure time)'              | 0  |                               |
| 18. | "Title=(noncompliance or nonadherence or nonpersistence or discontinuation or pharmionics) AND Review Text=(pharmacometric* or "causal inference")"                                                                                                         | 3  |                               |
| 19. | "Title=(noncompliance or nonadherence or nonpersistence or discontinuation or pharmionics) AND Review Text=(proportional hazards or structural model* or proportional hazards model* or structural nested model*)'                                          | 0  |                               |
| 20. | "Title=(noncompliance or nonadherence or nonpersistence or discontinuation or pharmionics) AND Review Text=(preserving structural failure or rank preserving structural or accelerated failure time)"                                                       | 1  |                               |
| 21. | or/11-20                                                                                                                                                                                                                                                    | 27 |                               |
