# Supplementary material for: Statistical Methods for Adjusting Estimates of Treatment Effectiveness for Patient Nonadherence in the Context of Time-to-Event Outcomes and Health Technology Assessment: A Systematic Review of Methodological Papers
Source: PubMed Central journal article supplement (PMC6900590; doi:10.1177/0272989x19881654), 2019-10-24
Supplement: Appendix_B_online_supp.pdf [file Appendix_B_online_supp.pdf]

## Appendix B: Supplementary Tables

**Table S1** Inclusion and Exclusion Criteria Applied for Selection of Selection of Papers Included in the Review

| Inclusion criteria                                                                                                                                  | Exclusion criteria                                                                                                    |
|-----------------------------------------------------------------------------------------------------------------------------------------------------|-----------------------------------------------------------------------------------------------------------------------|
| Peer-reviewed methodological papers which describe the method(s) in detail such that they can be applied without the need for further assumptions;* | Non-peer reviewed reports, books or book chapters, theses, or other grey literature;                                  |
| Methods explicitly applied to adjust for non-adherence in estimating treatment-effects for survival-time outcomes and/or cost-effectiveness;        | Papers which merely apply previously developed method(s) without any additional extension to the original method(s)+; |
| Papers published from databases inception to date; and                                                                                              | Methods which are not explicitly applied to adjust for non-adherence to treatments                                    |
| Papers published in the English language.                                                                                                           | Methods based on aggregated data such as meta-analysis; or                                                            |
|                                                                                                                                                     | Theoretical papers with no application of the method.                                                                 |

\* This criterion is not objective and required a judgement on my part informed by expert advice

+ This implied that the first paper proposing the method was included and any paper published afterwards with the application of the method without any methodological extension was excluded.

**Table S2** Data Extraction Form

| Basic information |           |                     |         | Methodological origin |                |               |                                                          |
|-------------------|-----------|---------------------|---------|-----------------------|----------------|---------------|----------------------------------------------------------|
| Paper ID#         | Author(s) | Year of publication | Journal | Method                | Method acronym | Methods Group | Type of methodological contribution (original/extension) |
|                   |           |                     |         |                       |                |               |                                                          |

**Table S2** Data Extraction Form (continued)

| Methodological origin (continued)                                |                                                                       |                                                                                       | Theoretical suitability   |                               |                                |                                          |
|------------------------------------------------------------------|-----------------------------------------------------------------------|---------------------------------------------------------------------------------------|---------------------------|-------------------------------|--------------------------------|------------------------------------------|
| Was the method originally developed to adjust for non-adherence? | If not, what was the original context and how the method was adapted? | Does the method represent an extension to another method adjusting for non-adherence? | How does the method work? | What are the key assumptions? | What are the potential biases? | Why might the method not be appropriate? |
|                                                                  |                                                                       |                                                                                       |                           |                               |                                |                                          |

**Table S2** Data Extraction Form (continued)

| Theoretical suitability (continued)                                   |                                                                                               | Application                                                                         |                                                              |                                                                 |                     |                                                                        |
|-----------------------------------------------------------------------|-----------------------------------------------------------------------------------------------|-------------------------------------------------------------------------------------|--------------------------------------------------------------|-----------------------------------------------------------------|---------------------|------------------------------------------------------------------------|
| What are the advantages and disadvantages associated with the method? | What are the similarities and differences of the method compared to other methods identified? | Has the method been applied to adjust for non-adherence in a case/simulation study? | What disease/condition applied in the case/simulation study? | What are intervention(s) assessed in the case/simulation study? | Outcome(s) assessed | What were the results compared to traditional approaches (ITT/PPT/AT)? |
|                                                                       |                                                                                               |                                                                                     |                                                              |                                                                 |                     |                                                                        |

**Table S3** Appraisal Framework

| <b>Domain</b>           | <b>Issues considered</b>                                                                                                                                                                                                                                                                                             |
|-------------------------|----------------------------------------------------------------------------------------------------------------------------------------------------------------------------------------------------------------------------------------------------------------------------------------------------------------------|
| Origin of the method    | Was the method originally developed to adjust for non-adherence?<br>If not, what was the original context and how the method was adapted?<br>Does the method represent an extension to another method adjusting for non-adherence?                                                                                   |
| Theoretical suitability | How does the method work?<br>What are the key assumptions?<br>What are the potential biases?<br>Why might the method not be appropriate?<br>What are the advantages and disadvantages associated with the method?<br>What are the similarities and differences of the method compared to other methods identified?   |
| Application             | Has the method been applied to adjust for non-adherence in a case study/simulation study?<br>What disease/condition is applied in the case/simulation study?<br>What is/are the intervention(s) assessed in the case/simulation study?<br>What were the results compared to simple methods (ITT/PP/AT), if compared? |

**Table S4** Characteristics of Papers Included in the Review (n=20)

| <b>Characteristic</b>                                | <b>No. (%)</b> |
|------------------------------------------------------|----------------|
| <b>Year</b>                                          |                |
| 2014-2018                                            | 6(30)          |
| 2009-2013                                            | 1(5)           |
| 2004-2008                                            | 3(15)          |
| 1999-2003                                            | 7(35)          |
| Before 1999                                          | 3(15)          |
| <b>Journal</b>                                       |                |
| Statistics in Medicine                               | 6(30)          |
| Biometrics                                           | 5(25)          |
| Journal of the Royal Statistical Society             | 3(15)          |
| Journal of the American Statistical Association      | 2(10)          |
| Clinical Pharmacology & Therapeutics                 | 1(5)           |
| Communication in Statistics - Theory and Methods     | 1(5)           |
| Epidemiology                                         | 1(5)           |
| Value in Health                                      | 1(5)           |
| <b>Type of study to which the method was applied</b> |                |
| Simulation study                                     | 3(15)          |
| Case study                                           | 6(30)          |
| Both simulation study and case study                 | 11(55)         |
| <b>Disease area</b>                                  |                |
| Breast cancer                                        | 5(25)          |
| AIDS                                                 | 3(15)          |
| Depression                                           | 2(10)          |
| Lung cancer                                          | 2(10)          |
| Leukaemia                                            | 2(10)          |
| Colorectal cancer                                    | 1(5)           |
| Atrial fibrillation                                  | 1(5)           |
| Gout                                                 | 1(5)           |
| Vitamin A deficiency                                 | 1(5)           |
| Hypertension                                         | 1(5)           |
| Hypothetical condition                               | 1(5)           |
